# Supplementary material for: Complete Chloroplast Genome Sequences of Four Species in the Caladium Genus: Comparative and Phylogenetic Analyses
Source: MDPI journal article supplement (doi:10.3390/genes13122180), 2022-11-22
Supplement: s1 [file s1]

**Table S2.** Functional classification of *Caladium* chloroplast genome.

| Category                                   | Code       | Gene names                                                                                                                                                                                                                                                                                                                                                                                                                                | Amount |
|--------------------------------------------|------------|-------------------------------------------------------------------------------------------------------------------------------------------------------------------------------------------------------------------------------------------------------------------------------------------------------------------------------------------------------------------------------------------------------------------------------------------|--------|
| Subunit of<br>Acetyl-CoA-carboxylase       | <i>acc</i> | <i>accD</i>                                                                                                                                                                                                                                                                                                                                                                                                                               | 1      |
| Envelop membrane<br>protein gene           | <i>cem</i> | <i>cemA</i>                                                                                                                                                                                                                                                                                                                                                                                                                               | 1      |
| c-type cytochrom<br>synthesis gene         | <i>ccs</i> | <i>ccsA</i>                                                                                                                                                                                                                                                                                                                                                                                                                               | 1      |
| Protease gene                              | <i>clp</i> | <i>clpP1</i>                                                                                                                                                                                                                                                                                                                                                                                                                              | 1      |
| Maturase gene                              | <i>mat</i> | <i>matK</i>                                                                                                                                                                                                                                                                                                                                                                                                                               | 1      |
| ATP synthase                               | <i>atp</i> | <i>atpA, atpB, atpE, atpF, atpH, atpI</i>                                                                                                                                                                                                                                                                                                                                                                                                 | 6      |
| NADH dehydrogenase                         | <i>ndh</i> | <i>ndhA, ndhB (×2), ndhC, ndhD, ndhE, ndhF,<br/>ndhG, ndhH, ndhI, ndhJ, ndhK</i>                                                                                                                                                                                                                                                                                                                                                          | 12     |
| Cytochrome b/f complex                     | <i>pet</i> | <i>petA, petB, petD, petG, petL, petN</i>                                                                                                                                                                                                                                                                                                                                                                                                 | 6      |
| Photosystem I                              | <i>psa</i> | <i>psaA, psaB, psaC, psaI, psaJ</i>                                                                                                                                                                                                                                                                                                                                                                                                       | 5      |
| Photosystem II                             | <i>psb</i> | <i>psbA, psbB, psbC, psbD, psbE, psbF, psbH,<br/>psbI, psbJ, psbK, psbL, psbM, psbT, psbZ</i>                                                                                                                                                                                                                                                                                                                                             | 14     |
| Rubisco                                    | <i>rbc</i> | <i>rbcL</i>                                                                                                                                                                                                                                                                                                                                                                                                                               | 1      |
| Large subunit ribosomal<br>proteins        | <i>rpl</i> | <i>rpl14, rpl16, rpl2 (×2), rpl20, rpl22, rpl23 (×2),<br/>rpl32, rpl33, rpl36</i>                                                                                                                                                                                                                                                                                                                                                         | 11     |
| RNA polymerase                             | <i>rpo</i> | <i>rpoA, rpoB, rpoC1, rpoC2</i>                                                                                                                                                                                                                                                                                                                                                                                                           | 4      |
| Small subunit ribosomal<br>proteins        | <i>rps</i> | <i>rps11, rps12 (×2), rps14, rps15, rps16, rps18,<br/>rps19, rps2, rps3, rps4, rps7 (×2), rps8</i>                                                                                                                                                                                                                                                                                                                                        | 14     |
| Ribosomal RNAs                             | <i>rrn</i> | <i>rrn16 (×2), rrn23 (×2), rrn4.5 (×2), rrn5 (×2),<br/>trnA-UGC (×2), trnC-GCA, trnD-GUC,<br/>trnE-UUC, trnF-GAA, trnG-GCC, trnG-UCC,<br/>trnH-GUG, trnI-CAU (×2), trnI-GAU (×2),<br/>trnK-UUU, trnL-CAA (×2), trnL-UAA,<br/>trnL-UAG, trnM-CAU, trnN-GUU (×2),<br/>trnP-UGG, trnQ-UUG, trnR-ACG (×2),<br/>trnR-UCU, trnS-GCU, trnS-GGA, trnS-UGA,<br/>trnT-GGU, trnT-UGU, trnV-GAC (×2),<br/>trnV-UAC, trnW-CCA, trnY-GUA, trnfM-CAU</i> | 8      |
| Transfer RNAs                              | <i>trn</i> |                                                                                                                                                                                                                                                                                                                                                                                                                                           | 37     |
| Hypothetical chloroplast<br>reading frames | <i>ycf</i> | <i>ycf1 (×2), ycf2 (×2)</i>                                                                                                                                                                                                                                                                                                                                                                                                               | 4      |
| Other proteins                             |            | <i>pafI, pafII, pbf1, infA</i>                                                                                                                                                                                                                                                                                                                                                                                                            | 4      |

Note: (×2) indicates the number of gene duplication.
