# Supplementary material for: Complete Chloroplast Genome Sequences of Four Species in the Caladium Genus: Comparative and Phylogenetic Analyses
Source: MDPI journal article supplement (doi:10.3390/genes13122180), 2022-11-22
Supplement: s1 [file s1]

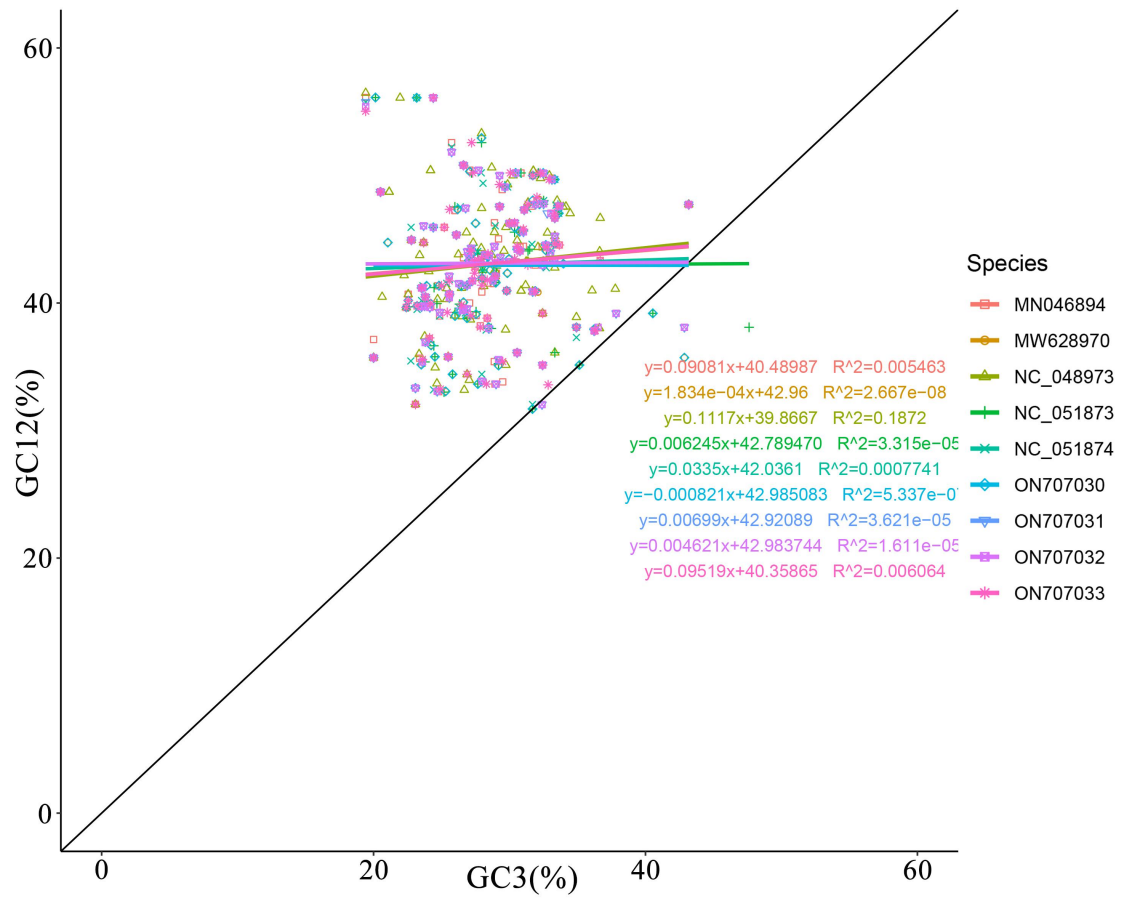

**Figure S2.** Neutrality analysis performed by plotting GC<sub>12</sub> values against GC<sub>3</sub> values for the cp genomes of nine species of Araceae. The diagonal line on the neutrality plot shows that the value of GC<sub>12</sub> is equal to GC<sub>3</sub>.
