# Supplementary material for: Complete Chloroplast Genome Sequences of Four Species in the Caladium Genus: Comparative and Phylogenetic Analyses
Source: MDPI journal article supplement (doi:10.3390/genes13122180), 2022-11-22
Supplement: s1 [file s1]

**Table S3.** Determination of optimal codons in the chloroplast genomes of *Caladium*.

| Codon | Amino acid | Number            |                      |                         |                    | Relative synonymous codon usage |                      |                         |                    |
|-------|------------|-------------------|----------------------|-------------------------|--------------------|---------------------------------|----------------------|-------------------------|--------------------|
|       |            | <i>C. bicolor</i> | <i>C. humboldtii</i> | <i>C. praetermissum</i> | <i>C. lindenii</i> | <i>C. bicolor</i>               | <i>C. humboldtii</i> | <i>C. praetermissum</i> | <i>C. lindenii</i> |
| GCA   | Ala        | 414               | 414                  | 415                     | 419                | 1.184                           | 1.184                | 1.181                   | 1.191              |
| GCC   | Ala        | 217               | 217                  | 219                     | 219                | 0.620                           | 0.620                | 0.623                   | 0.623              |
| GCG   | Ala        | 145               | 145                  | 143                     | 143                | 0.415                           | 0.415                | 0.407                   | 0.407              |
| GCU   | Ala        | 623               | 623                  | 628                     | 626                | 1.781                           | 1.781                | 1.788                   | 1.780              |
| AGA   | Arg        | 523               | 523                  | 515                     | 524                | 1.956                           | 1.958                | 1.940                   | 1.953              |
| AGG   | Arg        | 154               | 154                  | 156                     | 156                | 0.576                           | 0.576                | 0.588                   | 0.581              |
| CGA   | Arg        | 356               | 356                  | 354                     | 357                | 1.332                           | 1.333                | 1.333                   | 1.330              |
| CGC   | Arg        | 102               | 102                  | 103                     | 102                | 0.382                           | 0.382                | 0.388                   | 0.380              |
| CGG   | Arg        | 110               | 110                  | 113                     | 112                | 0.411                           | 0.412                | 0.426                   | 0.417              |
| CGU   | Arg        | 359               | 358                  | 352                     | 359                | 1.343                           | 1.340                | 1.326                   | 1.338              |
| AAC   | Asn        | 295               | 296                  | 298                     | 296                | 0.470                           | 0.472                | 0.472                   | 0.468              |
| AAU   | Asn        | 960               | 959                  | 966                     | 970                | 1.530                           | 1.528                | 1.528                   | 1.532              |
| GAC   | Asp        | 214               | 214                  | 217                     | 217                | 0.399                           | 0.399                | 0.402                   | 0.399              |
| GAU   | Asp        | 859               | 859                  | 862                     | 870                | 1.601                           | 1.601                | 1.598                   | 1.601              |
| UGC   | Cys        | 71                | 71                   | 76                      | 75                 | 0.473                           | 0.473                | 0.502                   | 0.493              |
| UGU   | Cys        | 229               | 229                  | 227                     | 229                | 1.527                           | 1.527                | 1.498                   | 1.507              |
| CAA   | Gln        | 699               | 698                  | 697                     | 698                | 1.495                           | 1.495                | 1.496                   | 1.491              |
| CAG   | Gln        | 236               | 236                  | 235                     | 238                | 0.505                           | 0.505                | 0.504                   | 0.509              |
| GAA   | Glu        | 1025              | 1025                 | 1035                    | 1045               | 1.480                           | 1.480                | 1.491                   | 1.486              |
| GAG   | Glu        | 360               | 360                  | 353                     | 361                | 0.520                           | 0.520                | 0.509                   | 0.514              |
| GGA   | Gly        | 727               | 727                  | 730                     | 728                | 1.647                           | 1.647                | 1.640                   | 1.638              |
| GGC   | Gly        | 167               | 166                  | 166                     | 165                | 0.378                           | 0.376                | 0.373                   | 0.371              |
| GGG   | Gly        | 296               | 297                  | 307                     | 300                | 0.670                           | 0.673                | 0.690                   | 0.675              |
| GGU   | Gly        | 576               | 576                  | 578                     | 585                | 1.305                           | 1.305                | 1.298                   | 1.316              |
| CAC   | His        | 154               | 154                  | 156                     | 158                | 0.488                           | 0.487                | 0.491                   | 0.496              |
| CAU   | His        | 477               | 478                  | 480                     | 479                | 1.512                           | 1.513                | 1.509                   | 1.504              |
| AUA   | Ile        | 701               | 701                  | 706                     | 706                | 0.945                           | 0.945                | 0.945                   | 0.941              |
| AUC   | Ile        | 425               | 425                  | 426                     | 431                | 0.573                           | 0.573                | 0.570                   | 0.575              |
| AUU   | Ile        | 1100              | 1100                 | 1110                    | 1113               | 1.482                           | 1.482                | 1.485                   | 1.484              |
| CUA   | Leu        | 367               | 368                  | 368                     | 370                | 0.812                           | 0.814                | 0.813                   | 0.817              |
| CUC   | Leu        | 179               | 179                  | 181                     | 181                | 0.396                           | 0.396                | 0.400                   | 0.400              |
| CUG   | Leu        | 166               | 166                  | 162                     | 166                | 0.367                           | 0.367                | 0.358                   | 0.366              |
| CUU   | Leu        | 586               | 585                  | 580                     | 583                | 1.296                           | 1.294                | 1.281                   | 1.287              |
| UUA   | Leu        | 835               | 835                  | 837                     | 832                | 1.847                           | 1.847                | 1.848                   | 1.837              |
| UUG   | Leu        | 579               | 580                  | 589                     | 586                | 1.281                           | 1.283                | 1.301                   | 1.294              |
| AAA   | Lys        | 1033              | 1034                 | 1058                    | 1041               | 1.483                           | 1.484                | 1.479                   | 1.477              |
| AAG   | Lys        | 360               | 360                  | 373                     | 369                | 0.517                           | 0.516                | 0.521                   | 0.523              |

|     |     |     |     |     |     |       |       |       |       |
|-----|-----|-----|-----|-----|-----|-------|-------|-------|-------|
| AUG | Met | 608 | 608 | 608 | 602 | 1.997 | 1.997 | 1.997 | 1.997 |
| GUG | Met | 1   | 1   | 1   | 1   | 0.003 | 0.003 | 0.003 | 0.003 |
| UUC | Phe | 537 | 537 | 540 | 540 | 0.714 | 0.714 | 0.715 | 0.718 |
| UUU | Phe | 968 | 967 | 971 | 965 | 1.286 | 1.286 | 1.285 | 1.282 |
| CCA | Pro | 330 | 330 | 331 | 335 | 1.220 | 1.220 | 1.211 | 1.230 |
| CCC | Pro | 205 | 205 | 206 | 202 | 0.758 | 0.758 | 0.754 | 0.742 |
| CCG | Pro | 117 | 117 | 119 | 118 | 0.433 | 0.433 | 0.435 | 0.433 |
| CCU | Pro | 430 | 430 | 437 | 434 | 1.590 | 1.590 | 1.599 | 1.594 |
| AGC | Ser | 104 | 104 | 102 | 104 | 0.303 | 0.303 | 0.294 | 0.299 |
| AGU | Ser | 427 | 427 | 441 | 441 | 1.245 | 1.245 | 1.272 | 1.267 |
| UCA | Ser | 435 | 435 | 436 | 443 | 1.268 | 1.268 | 1.257 | 1.273 |
| UCC | Ser | 342 | 342 | 344 | 344 | 0.997 | 0.997 | 0.992 | 0.989 |
| UCG | Ser | 178 | 178 | 176 | 180 | 0.519 | 0.519 | 0.507 | 0.517 |
| UCU | Ser | 572 | 572 | 582 | 576 | 1.668 | 1.668 | 1.678 | 1.655 |
| UAA | Ter | 41  | 41  | 40  | 40  | 1.430 | 1.430 | 1.395 | 1.395 |
| UAG | Ter | 26  | 26  | 26  | 27  | 0.907 | 0.907 | 0.907 | 0.942 |
| UGA | Ter | 19  | 19  | 20  | 19  | 0.663 | 0.663 | 0.698 | 0.663 |
| ACA | Thr | 436 | 436 | 435 | 437 | 1.290 | 1.290 | 1.278 | 1.282 |
| ACC | Thr | 243 | 243 | 246 | 245 | 0.719 | 0.719 | 0.723 | 0.718 |
| ACG | Thr | 151 | 151 | 152 | 152 | 0.447 | 0.447 | 0.447 | 0.446 |
| ACU | Thr | 522 | 522 | 528 | 530 | 1.544 | 1.544 | 1.552 | 1.554 |
| UGG | Trp | 452 | 452 | 451 | 452 | 1.000 | 1.000 | 1.000 | 1.000 |
| UAC | Tyr | 204 | 204 | 204 | 206 | 0.420 | 0.420 | 0.421 | 0.421 |
| UAU | Tyr | 768 | 768 | 764 | 773 | 1.580 | 1.580 | 1.579 | 1.579 |
| GUA | Val | 518 | 518 | 521 | 526 | 1.425 | 1.425 | 1.426 | 1.438 |
| GUC | Val | 187 | 187 | 190 | 189 | 0.514 | 0.514 | 0.520 | 0.517 |
| GUG | Val | 206 | 206 | 209 | 209 | 0.567 | 0.567 | 0.572 | 0.571 |
| GUU | Val | 543 | 543 | 541 | 539 | 1.494 | 1.494 | 1.481 | 1.474 |
