# Supplementary figures and images for: Complete Chloroplast Genome Sequences of Four Species in the Caladium Genus: Comparative and Phylogenetic Analyses
Source: MDPI journal article supplement (doi:10.3390/genes13122180), 2022-11-22

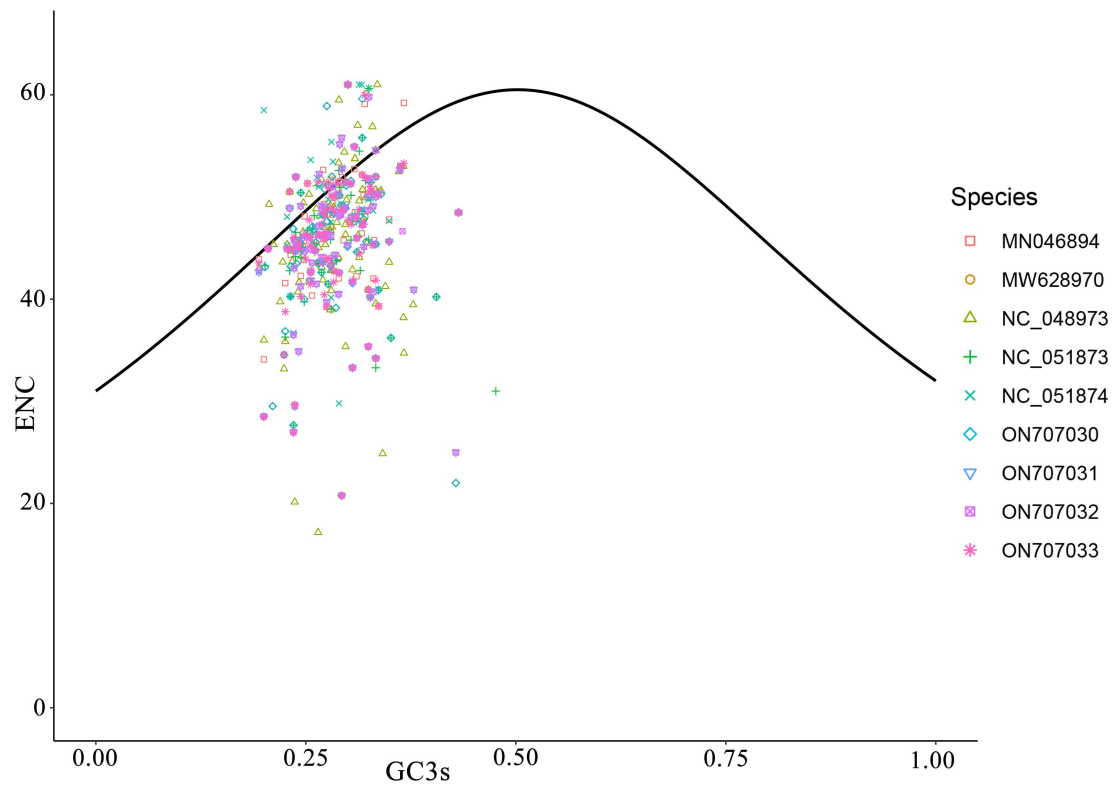

**Figure S1.** Analysis of ENC-plot in the cp genomes of nine species of Araceae.

Supplement: s1 [file s1]
